1 **A gene expression-based diagnostic classifier for identification of severe COVID-19 and**  
2 **multisystem inflammatory syndrome in children (MIS-C)**

3 Alicia Sotomayor-Gonzalez<sup>1#</sup>, Conor J. Loy<sup>2#</sup>, Jenny Nguyen<sup>1#</sup>, Venice Servellita<sup>1#</sup>, Sanchita  
4 Bhattacharya<sup>4</sup>, Joan Lenz<sup>2</sup>, Meagan Williams<sup>5</sup>, Will Suslovic<sup>5</sup>, Alexandre P. Cheng<sup>2</sup>, Andrew  
5 Bliss<sup>2</sup>, Prachi Saldhi<sup>1</sup>, Jessica Streithorst<sup>1</sup>, Hee Jae Huh<sup>6</sup>, Abiodun Foresythe<sup>2</sup>, Miriam  
6 Oseguera<sup>1</sup>, Katrina de la Cruz<sup>1</sup>, Noah Brazer<sup>1</sup>, Nathan Wood<sup>3</sup>, Charlotte Hsieh<sup>3</sup>, Burak Bahar<sup>5</sup>,  
7 Amelia Gliwa<sup>1</sup>, Kushmita Bhakta<sup>6</sup>, Maria A. Perez<sup>6</sup>, Evan J. Anderson<sup>6,7</sup>, Ann Chahroudi<sup>6</sup>,  
8 Meghan Delaney<sup>5</sup>, Atul J. Butte<sup>4</sup>, Roberta DeBiasi<sup>5</sup>, Christina A. Rostad<sup>6</sup>, Iwijn De Vlaminck<sup>2\*</sup>,  
9 Charles Chiu<sup>1,8\*</sup>.

10

11 Affiliations:

12 <sup>1</sup>Department of Laboratory Medicine, University of California, San Francisco, San Francisco,  
13 CA, USA

14 <sup>2</sup>Meinig School of Biomedical Engineering, Cornell University, Ithaca, NY, USA

15 <sup>3</sup>UCSF Benioff Children's Hospital, Oakland, CA, USA

16 <sup>4</sup>Bakar Computational Health Sciences Institute, University of California, San Francisco, San  
17 Francisco, CA, USA

18 <sup>5</sup>Children's National Hospital, Washington D.C., USA

19 <sup>6</sup>Department of Laboratory Medicine and Genetics, Samsung Medical Center, Sungkyunkwan  
20 University School of Medicine, Seoul, South Korea

21 <sup>6</sup>Department of Pediatrics and Center for Childhood Infections at Vaccines, Emory University  
22 School of Medicine and Children's Healthcare of Atlanta, Atlanta, GA, USA-

23 <sup>7</sup>Department of Medicine, Emory University School of Medicine, Atlanta, GA, US

24 <sup>8</sup>Department of Medicine, Division of Infectious Diseases, University of California, San  
25 Francisco, San Francisco, CA, USA

26

27 <sup>#</sup>These authors contributed equally

28 <sup>\*</sup>Co-corresponding authors: [charles.chiu@ucsf.edu](mailto:charles.chiu@ucsf.edu), [id93@cornell.edu](mailto:id93@cornell.edu)

29

30

31 **KEY WORDS:** multisystem inflammatory syndrome in children (MIS-C), SARS-CoV-2,  
32 coronavirus disease 2019, cell-free RNA, whole blood RNA, RNA sequencing, RNA-Seq,  
33 clinical severity, nucleic acid sequencing, host response, disease biomarkers, classifier  
34 models, machine learning, random forest, reverse transcription polymerase chain reaction.

35  
36 **ABSTRACT**

37 MIS-C is a severe hyperinflammatory condition with involvement of multiple organs that  
38 occurs in children who had COVID-19 infection. Accurate diagnostic tests are needed to guide  
39 management and appropriate treatment and to inform clinical trials of experimental drugs and  
40 vaccines, yet the diagnosis of MIS-C is highly challenging due to overlapping clinical features  
41 with other acute syndromes in hospitalized patients. Here we developed a gene expression-  
42 based classifier for MIS-C by RNA-Seq transcriptome profiling and machine learning based  
43 analyses of 195 whole blood RNA and 76 plasma cell-free RNA samples from 191 subjects,  
44 including 95 MIS-C patients, 66 COVID-19 infected patients with moderately severe to severe  
45 disease, and 30 uninfected controls. We divided the group into a training set (70%) and test  
46 set (30%). After selection of the top 300 differentially expressed genes in the training set, we  
47 simultaneously trained 13 classification models to distinguish patients with MIS-C and COVID-  
48 19 from controls using five-fold cross-validation and grid search hyperparameter tuning. The  
49 final optimal classifier models had 100% diagnostic accuracy for MIS-C (versus non-MIS-C)  
50 and 85% accuracy for severe COVID-19 (versus mild/asymptomatic COVID-19). Orthogonal  
51 validation of a random subset of 11 genes from the final models using quantitative RT-PCR  
52 confirmed the differential expression and ability to discriminate MIS-C and COVID-19 from

53 controls. These results underscore the utility of a gene expression classifier for diagnosis of  
54 MIS-C and severe COVID-19 as specific and objective biomarkers for these conditions.

55

## 56 INTRODUCTION

57 Multisystem inflammatory syndrome in children (MIS-C) is a severe post-infectious  
58 complication of SARS-CoV-2 infection in pediatric patients that is characterized by severe  
59 disease with systemic hyperinflammation and multi-organ involvement<sup>1</sup>. On average,  
60 symptoms of MIS-C first present two to four weeks after acute COVID-19 illness and can  
61 involve a constellation of respiratory, gastrointestinal, cardiac, renal, dermatologic, and  
62 neurological symptoms that in 60% of cases result in hospitalization and possible ICU stay with  
63 invasive mechanical ventilation required due to inadequate oxygenation<sup>2</sup>. Diagnosis of MIS-C  
64 is challenging due to overlapping clinical features with other hyperinflammatory illnesses, such  
65 as Kawasaki Disease (KD) and Toxic Shock Syndrome (TSS)<sup>3,4</sup>, and the lack of objective  
66 biomarker based diagnostic tests hinders accurate diagnosis and effective management and  
67 treatment for this condition<sup>5</sup>. As of August 2022, the CDC has reported 8,798 cases of MIS-C  
68 and 71 deaths attributed to MIS-C in children<sup>6</sup>, defined as individuals under 21 years of age.

69 Transcriptome analysis by RNA sequencing (RNA-Seq) has been shown to be useful in  
70 the diagnosis of rare genetic diseases<sup>7</sup> and infections such as Lyme disease<sup>8</sup>, influenza<sup>9</sup>, and  
71 COVID-19<sup>10</sup>. In a previous study<sup>11</sup>, analysis of plasma cell-free RNA from patients with MIS-C  
72 or severe COVID-19 yielded distinct signatures of cell injury and death between these two  
73 disease states, including the involvement of unexpected pathways such as endothelial and  
74 neuronal Schwann cell signaling. These signatures were different from those from whole blood  
75 RNA profiling<sup>10-13</sup>, which showed upregulation of pro-inflammatory signaling pathways in

76 COVID-19 but downregulation of T cell-associated pathways in MIS-C. Given the findings of  
77 distinct signaling pathways<sup>11</sup>, we hypothesized that whole blood and plasma would be  
78 promising analytes for the development of diagnostic assays for severe COVID-19 and MIS-C.

79 Here we trained machine learning algorithms to identify panels of differentially  
80 expressed genes that can distinguish MIS-C or severe COVID-19 from uninfected controls  
81 (donors or patients with other inflammatory diseases). We obtained performance accuracies  
82 for the gene panels of 85-100% and confirmed the differential expression of a subset of genes  
83 by qRT-PCR. Our results lay the groundwork for the development and clinical validation of  
84 multiplexed RNA gene expression-based assays for MIS-C and severe COVID-19.

## 86 RESULTS

87 Transcriptome profiling using RNA-Seq was performed on 195 whole blood RNA  
88 (wbRNA) samples and 76 plasma cell-free RNA (cfRNA) samples from 191 subjects, including  
89 95 MIS-C patients, 66 COVID-19 infected patients, and 30 uninfected controls. A mean of 31  
90 million reads were generated per whole blood sample and a mean of 8.6 million reads were  
91 generated per cell-free sample. No batch effect based on collection center was observed.

92 We divided the samples into two sets, a training set (70%) and a test set (30%), with  
93 consideration to sample origin and severity of disease (**Fig. 1A**). Next, we performed feature  
94 selection on the training set. We removed genes with low counts and near zero variance. We  
95 selected the top 300 relevant features selected using differential expression/abundance  
96 analysis in DESeq2<sup>14</sup> (Benjamini-Hochberg adjusted p-value < 0.05, ranked by fold change).

97

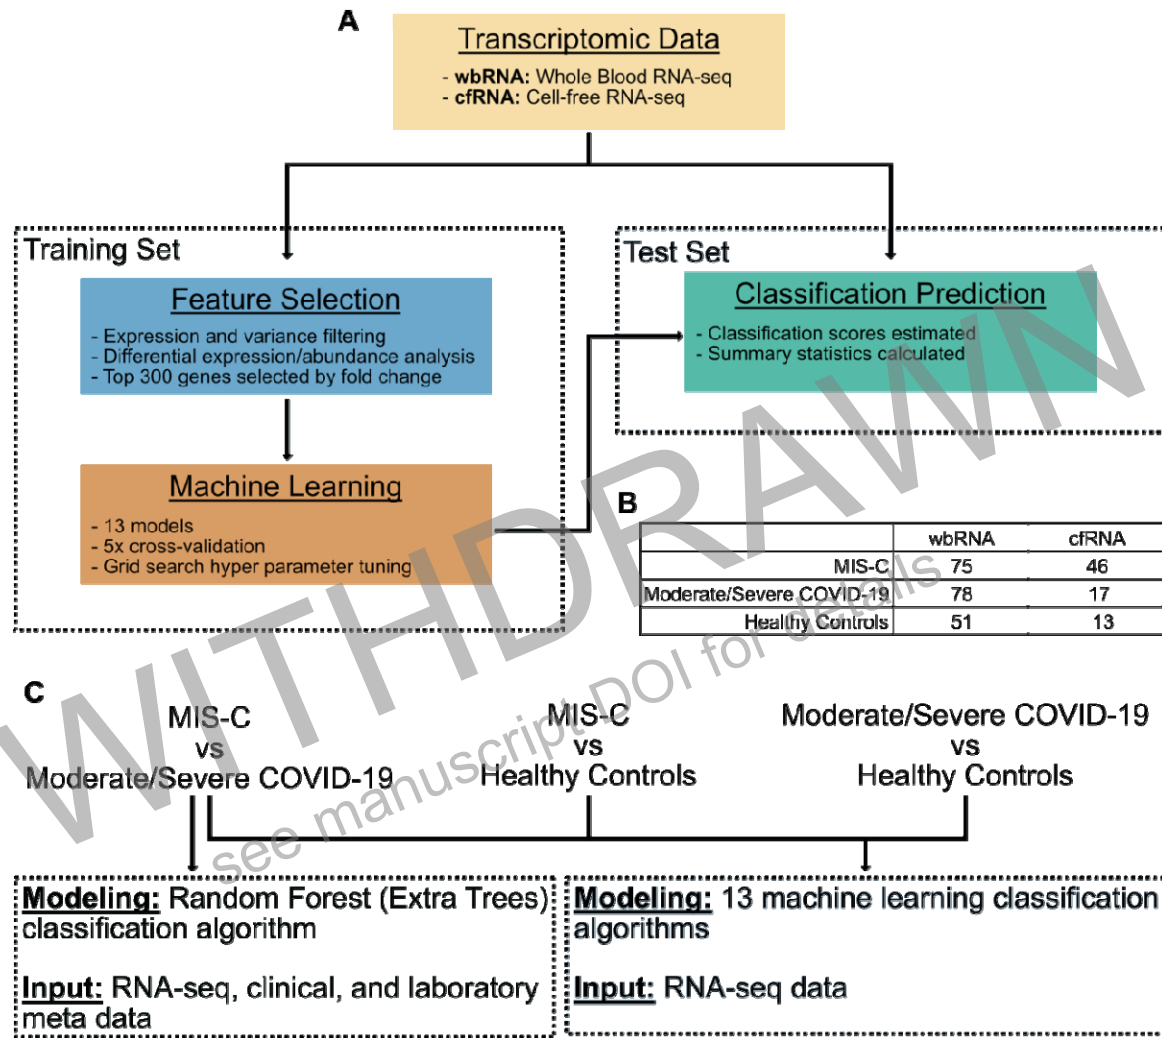

98

99

100

101

102

103

104

105

106

107

**Figure 1. Sample description. (A)** Flowchart of the method used to train and test machine learning classification algorithms. **(B)** Number of samples for each group **(C)** Overview of comparisons made and the classification algorithms used.

Using the top 300 relevant features, we trained 13 machine learning classification models<sup>8</sup> and fit a logistic regression to distinguish wbRNA or cfRNA profiles from patients with MIS-C, COVID-19, and good health (**Fig. 1B-C**). We used five-fold cross-validation and grid search hyperparameter tuning to train the models. To determine classification score thresholds

108 that optimize classifier performance, we used Receiver Operating Characteristic (ROC)  
109 analysis. Next, we applied the trained models to the test set samples, with the classification  
110 score threshold determined from the training step, and we quantified the performance of each  
111 model for both wbRNA and cfRNA biomarkers (**Fig. 2A**).

112 We observed high classification performance comparing samples from patients with  
113 MIS-C and COVID-19 for both wbRNA and cfRNA using 9 machine learning algorithms (**Fig.**  
114 **2A**, test and train area under the curve (AUC) > 0.95). The generalized linear models with  
115 Ridge and LASSO feature selection performed the best for both wbRNA and cfRNA (**Fig. 2B-**  
116 **C**, wbRNA: accuracy=0.95, sensitivity=1, specificity=0.83; cfRNA: accuracy=0.93,  
117 sensitivity=0.96, specificity=0.89). We also observed high classification performance  
118 comparing samples from patients with MIS-C and good health for both wbRNA and cfRNA and  
119 for most models, as would be expected. Surprisingly, we observed lower classification  
120 performance comparing samples from patients with COVID-19 and good health, particularly in  
121 the cell-free RNA samples (**Fig. 2A**). We attribute this to overfitting of the training model, due  
122 to a combination of a small sample size for this comparison and the heterogeneity of the  
123 affected population. For the severe versus mild/asymptomatic COVID-19 comparison using  
124 wbRNA, the best performing algorithms included Random Forest (RF) Extra Trees, Naïve  
125 Bayes (NB), and Classification and Regression Trees (RPART), with all models yielding an  
126 accuracy of >85% (Fig. 3A).

127 Next, we incorporated clinical metadata into our modeling using the Random Forest  
128 Extra Trees algorithm (**Fig. 4A-B**). We observed high classification performance for both  
129 wbRNA and cfRNA in differentiating between samples from patients with MIS-C and COVID-  
130 19. Incorporating the clinical metadata increased the performance of the cfRNA model, but did

131 not impact the performance of the wbRNA model (**Fig. 4C**). Both models were performing well  
132 to begin with, and we believe that a larger data set would be needed to better measure the  
133 difference incorporating clinical metadata has on classification performance.

134

135

136

137

138

139

140

141

142

WITHDRAWN  
see manuscript DOI for details

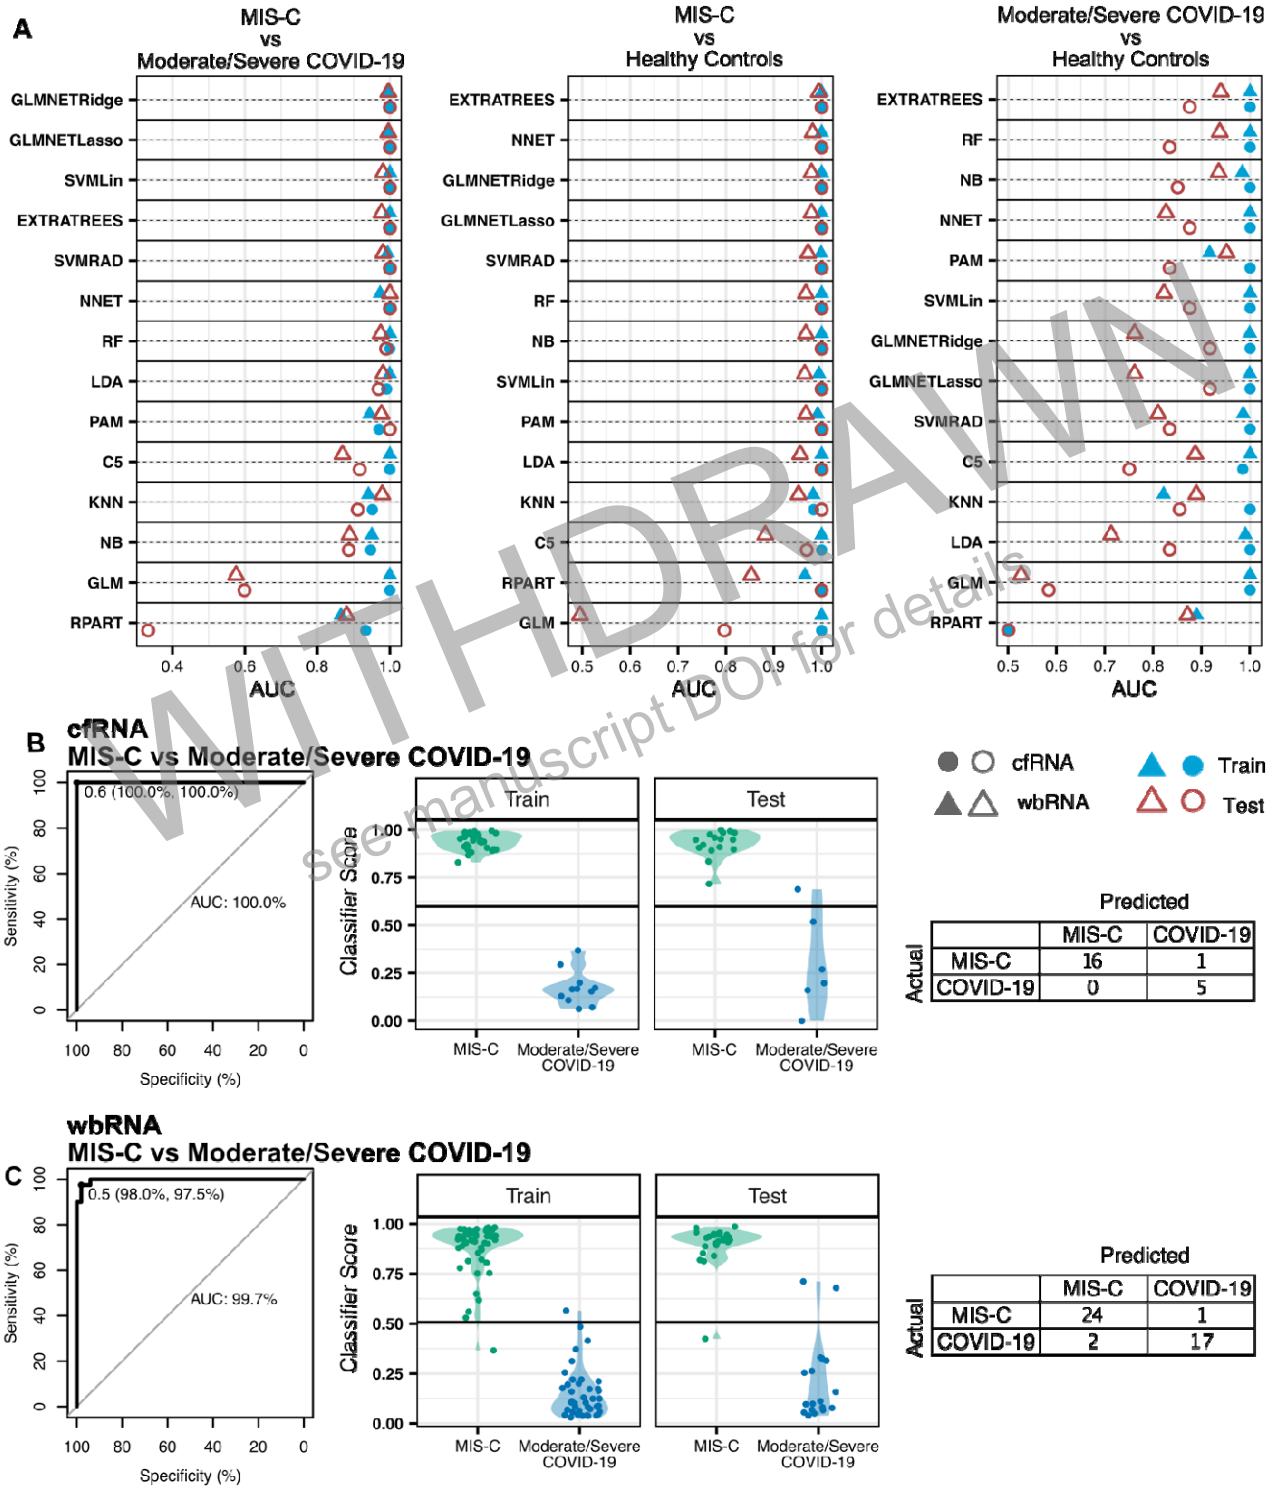

143

144 **Figure 2. Comparison of machine learning classification algorithms using RNA-seq**

145 **data. (A) Receiver operator curve (ROC) area under the curve (AUC) metrics of 13 machine**



146 learning algorithms and logistic regression for training and test sets in cfRNA or wbRNA across  
 147 comparisons. **(B)** Train and test performance of a generalized linear model machine learning  
 148 algorithm using Ridge feature selection in distinguishing MIS-C and Moderate/Severe COVID-  
 149 19 in cfRNA and **(C)** wbRNA.

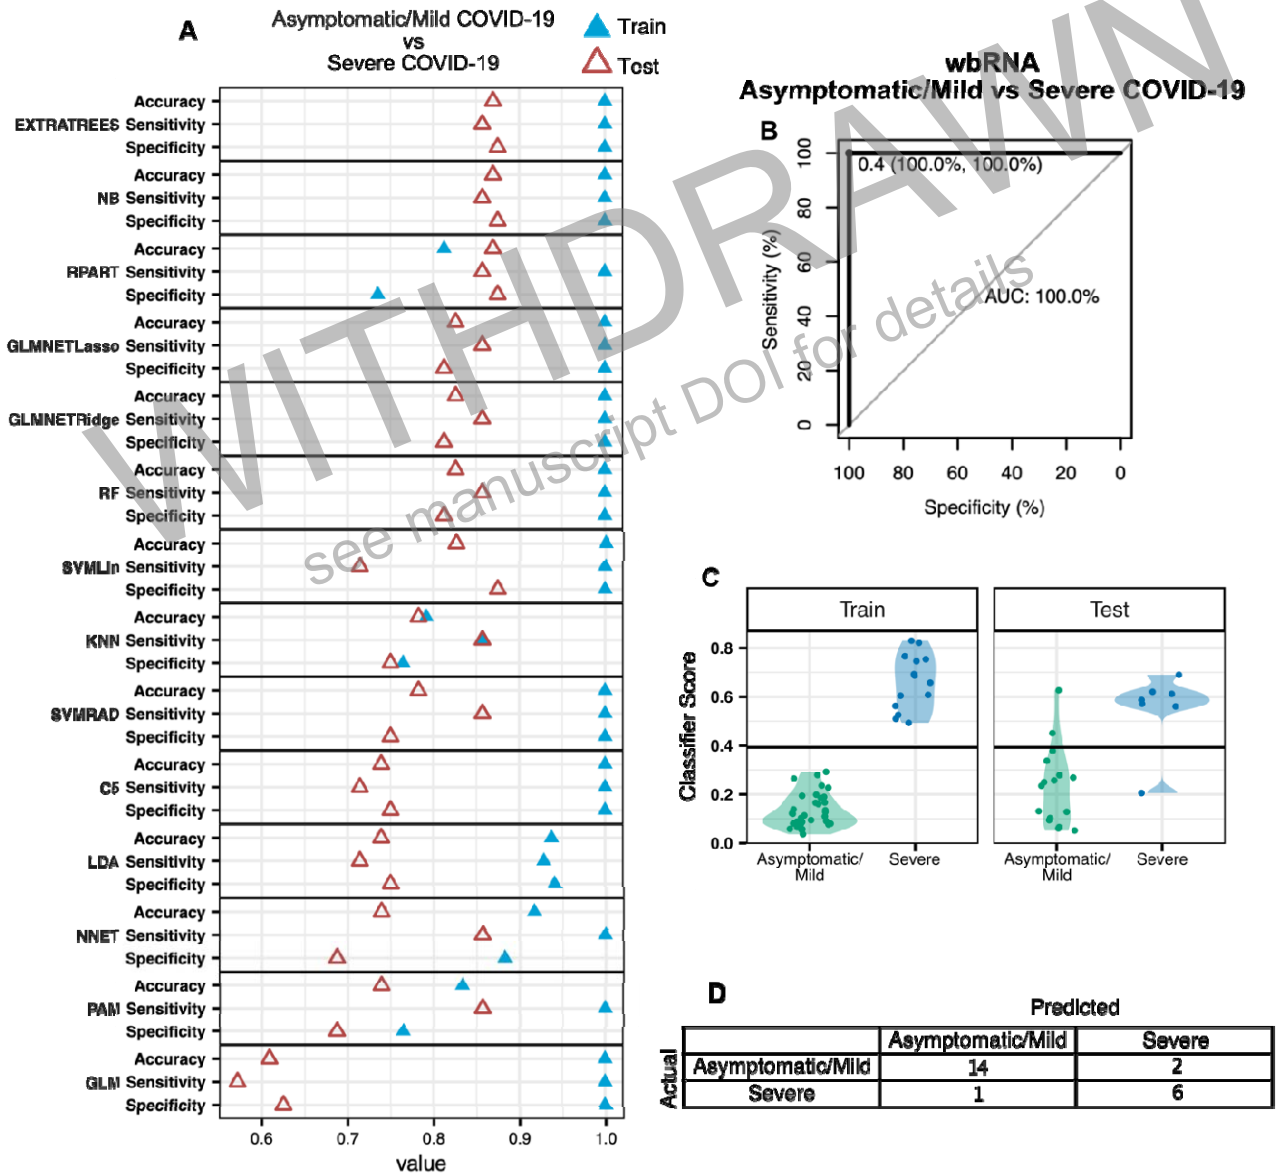

150

151 **Figure 3. Comparison of machine learning classification algorithms at predicting**

152 **COVID-19 severity. (A)** Accuracy, sensitivity, and specificity of 13 machine learning

153 algorithms and logistic regression for training and test sets in wbRNA. **(B)** Receiver operator

154 curve (ROC) area under the curve (AUC) plot of wbRNA test set using the RF Extra Trees  
 155 algorithm. (C) Violin plot of classifier scores from the RF Extra Trees algorithm on the train and  
 156 test sets. (D) Confusion matrix of RF Extra Trees algorithm performance on the test set.  
 157  
 158

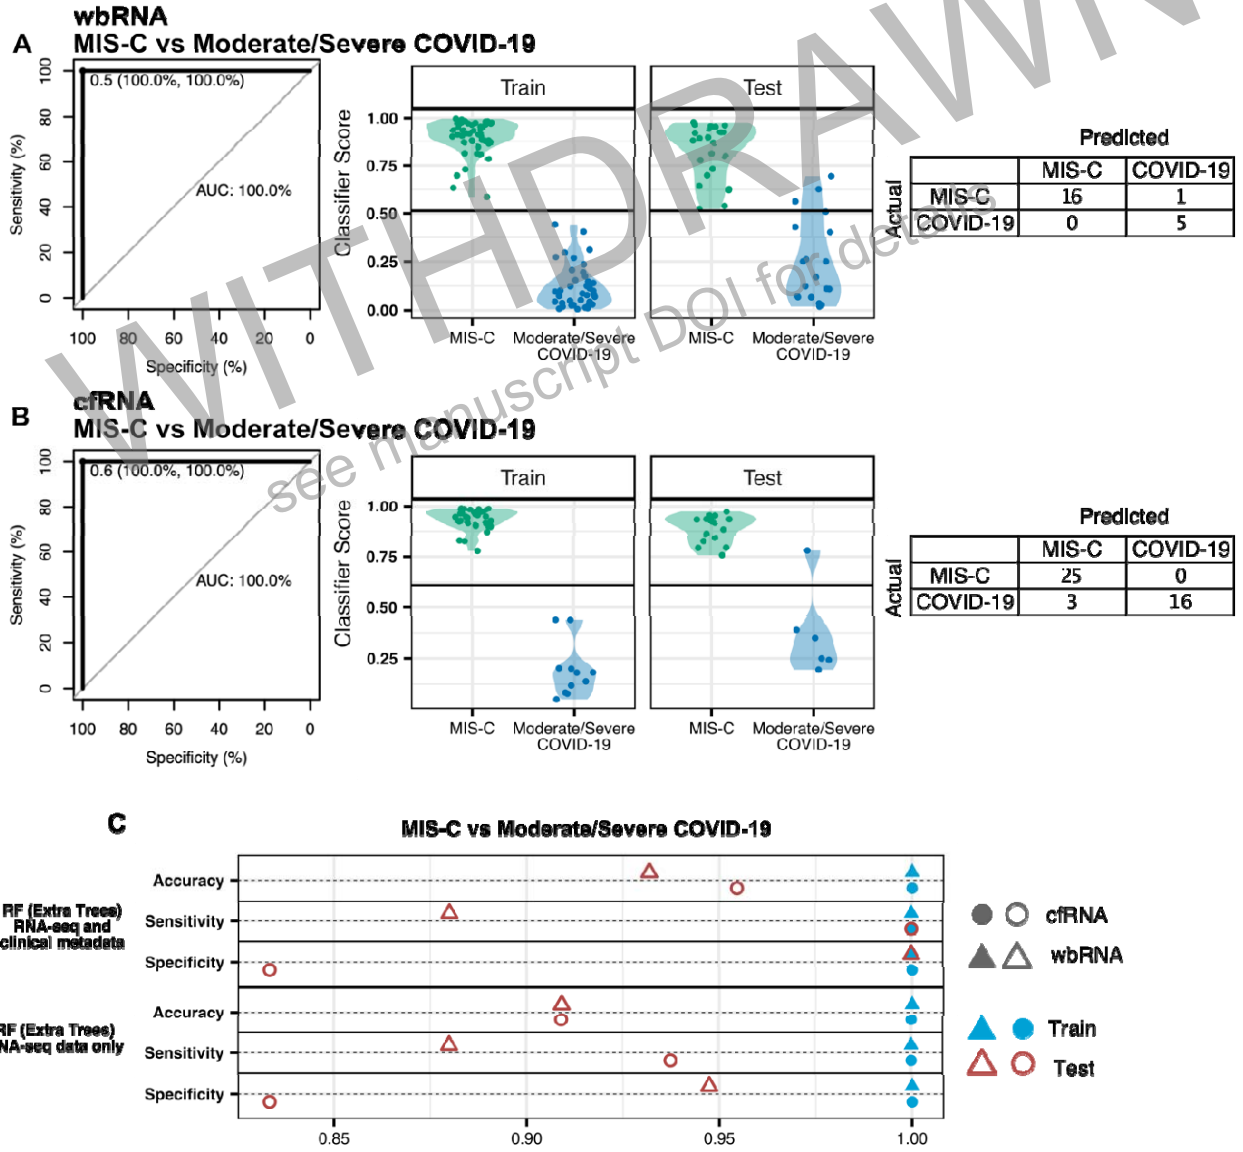

159  
 160 **Figure 4. A composite model incorporating RNA-seq and clinical metadata in classifying**  
 161 **MIS-C from Moderate/Severe COVID-19 (A) Train and test performance of a Random Forest**

162 Extra Trees classification algorithm in distinguishing MIS-C and Moderate/Severe COVID-19 in  
163 cfRNA and **(B)** wbRNA utilizing RNA-seq and clinical metadata. **(C)** Comparison of ROC AUC  
164 metrics between Random Forest Extra Trees classification algorithms utilizing RNA-seq data  
165 with and without the addition of clinical metadata in distinguishing MIS-C and Moderate/Severe  
166 COVID-19 in cfRNA and wbRNA.

167

168 Finally, we evaluated the performance of gene expression from a subset of top differentially  
169 expressed genes (DEGs) in whole blood samples from MIS-C, severe COVID-19 (excluding  
170 MIS-C cases), and uninfected controls. A subset of 12 differentially expressed genes  
171 (FCER1A, ADAMTS2, CD177, LMOD1, KCNA5, OLAH, OTOF, TIFAB, B3GALT2, ITGA7,  
172 PLA267, and IFI27) were randomly selected and tested. The results, expressed in cycle  
173 threshold ( $C_t$ ) values, were concordant with the relative differences in expression levels and  
174 direction of gene expression (upregulation or downregulation), as reported in the previous  
175 study<sup>11</sup>. Differences in expression between MIS-C or severe COVID-19 and uninfected  
176 controls were statistically significant for four genes (ADAMTS2, CD177, OLAH, and TIFAB),  
177 whereas the differences between MIS-C and severe COVID-19 were significant for three  
178 genes (ADAMTS2, CD177, and OLAH).

179

180

181 **Figure 5. Confirmation of differential gene expression by quantitative RT-PCR (qRT-**  
182 **PCR).** Twelve genes predicted to distinguish MIS-C and severe COVID-19 from uninfected  
183 controls were tested by qRT-PCR with 3 sample replicates and 2 assay replicates per gene.  
184 Genes highlighted in red text are downregulated in MIS-C and COVID-19 compared to  
185 controls. The symbols and error bars denote the mean and standard deviation, respectively,  
186 for the 3 sample replicates.

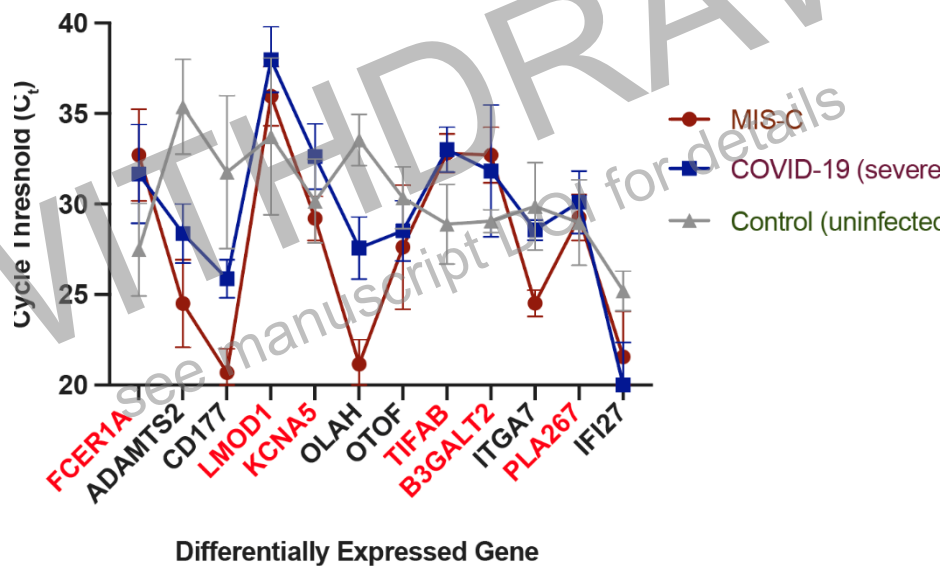

187

## 188 DISCUSSION

189 Here we developed classifier models for severe manifestations of COVID-19, including  
190 MIS-C and moderate-to-severe, non-MIS-C COVID-19, consisting mostly of pneumonia cases,  
191 that can result in hospitalization and adverse clinical outcomes such as ICU admission, end-  
192 organ failure, and death<sup>15</sup>. Transcriptome profiling by RNA-Seq was performed on 195 wbRNA  
193 and 76 plasma cfRNA samples from 191 subjects, and sequencing data from 70% of samples  
194 assigned to a training set were used to generate models with 100% accuracy in discriminating  
195 MIS-C from non-MIS-C, and >85% accuracy in severe COVID-19 versus mild/asymptomatic

196 COVID-19. We subsequently confirmed differential gene expression among MIS-C, severe  
197 COVID-19, and uninfected controls by orthogonal qRT-PCR of 11 genes taken from the final  
198 model. These findings underscore the potential clinical utility of gene expression-based  
199 classification in the development and validation of diagnostic assays for MIS-C and severe  
200 COVID-19.

201 A high degree of overlap in symptomatology and clinical presentation between severe  
202 manifestations of COVID-19 and other acute illnesses in hospitalized patients has been  
203 reported<sup>3,4</sup>. Acute syndromes that can mimic MIS-C include Kawasaki disease<sup>3</sup>, toxic shock  
204 syndrome<sup>3</sup>, bacterial or viral sepsis<sup>4</sup>, and even non-infectious conditions such as congestive  
205 heart failure, whether or not directly related to MIS-C<sup>16</sup>. In contrast, acute illnesses that can  
206 mimic severe COVID-19 include many infections<sup>17-19</sup>, including those caused by respiratory  
207 viruses (e.g., influenza virus, parainfluenza virus, adenovirus, etc.), bacterial pneumonia,  
208 including tuberculosis, malaria, and chronic obstructive pulmonary disease exacerbation.  
209 However, whereas molecular or antigen tests for SARS-CoV-2 from nasal swabs can readily  
210 diagnose COVID-19, and diagnostic tests for many other illnesses in the differential diagnosis  
211 are available, specific biomarkers and tests for MIS-C are lacking to date. Such diagnostic  
212 tests for MIS-C would be useful to inform accurate and timely management of patients with  
213 inflammatory diseases that have clinically overlapping presentations. They may also be used  
214 as a “companion diagnostic” to clinical trials of drugs and/or vaccines by providing an objective  
215 measure of the response to and effectiveness of an intervention<sup>20</sup>.

216 Similarly, there is an urgent need for diagnostic tests that can establish whether a  
217 patient has severe COVID-19. This is especially important as the widespread availability of  
218 effective vaccines to prevent severe complications of COVID-19 has led to a sharp decline in

219 the number of cases in the United States and worldwide as of September 2022<sup>21</sup>, which may  
220 decrease clinical vigilance for patients at high risk of life-threatening complications or death  
221 from COVID-19. Timely diagnosis can enable patients to promptly receive antiviral therapies  
222 such as ritonavir-boosted nirmatrelvir(Paxlovid)<sup>22</sup>, the effectiveness of which wanes in patients  
223 with delayed diagnosis and more severe disease, thereby decreasing lengths of stay in the  
224 hospital and reducing utilization of limited health care resources.

225 Our study employed orthogonal confirmation of transcriptome profiling results by  
226 multiplex qRT-PCR<sup>23</sup>. This approach not only supports the accuracy of the gene expression-  
227 based models, but also highlights how these assays may be introduced into the clinical setting  
228 soon. Clinical multiplex qRT-PCR syndromic panels are now widely available for diagnosis of  
229 multiple infectious diseases<sup>24-26</sup>, including neurological infections, acute respiratory illness, and  
230 diarrheal disease, or gastroenteritis. These panels have the advantage of moderate to high-  
231 throughput, batch testing capability, and low cost, none of which is the case with next-  
232 generation sequencing based platforms. Thus, diagnostic assays based on a condensed panel  
233 of 30-50 genes may be more conducive to clinical laboratory workflows than those based on  
234 next-generation sequencing.

235 Our study has some limitations. First, we had a very limited number of samples from  
236 patients with “MIS-C-like” illnesses – Kawasaki disease, toxic shock syndrome, and/or acute  
237 bacterial sepsis<sup>3,4</sup>. Comparisons between MIS-C and these aforementioned diseases is  
238 probably more useful than comparisons between MIS-C and COVID-19 or donor controls.  
239 Second, without longitudinal samples, we were unable to ascertain the prognostic utility of  
240 classifier models in predicting clinical outcomes, whether patients will clinically deteriorate and  
241 develop more severe disease over time. Third, although we used a fully independent test set in

242 these analyses, the divergence in assay performance between the training and test set data  
243 suggests that the models may be slightly overfit; additional sample sizes are likely needed to  
244 address this problem.

245

246

## 247 **METHODS**

248 **Ethics Statement.** The University of California, San Francisco (UCSF) Institutional Review  
249 Board (IRB) (#21-33403), San Francisco, CA; Emory University IRB (STUDY00000723),  
250 Atlanta, GA; Childrens National Medical Center (CNMC) IRB (Pro00010632), Washington, DC;  
251 and Cornell University IRB for Human Participants (2012010003), New York, NY each  
252 approved the protocols for this study. All samples and patient information were de-identified for  
253 analysis and sharing with collaboration institutions. At Emory University the IRB approved  
254 protocol was a prospective enrollment study under which parents provided consent and  
255 children assent as appropriate for age. At CNMC and UCSF, the IRB protocols were no  
256 subject contact sample biobanking protocols under which consent was not obtained and data  
257 was extracted from medical charts.

258

259 **Sample Acquisition UCSF.** Samples were acquired from UCSF as previously described<sup>11</sup>.  
260 Briefly, hospitalized pediatric patients were identified as having COVID-19 by testing positive  
261 with SARS-CoV-2 real-time PCT (RT-PCR). Whole blood samples were collected in EDTA  
262 lavender top tubes and diluted 1:1: in DNA/RNA shield (Zymo Research). Remaining blood  
263 was centrifuged at 2500 rpm for 15 min and the available plasma was retained. All samples  
264 were stored in a -80°C freezer until used.

265

266 **Sample Acquisition Emory and Children's Healthcare of Atlanta.** Samples were acquired  
267 from Emory and Children's Healthcare of Atlanta as previously described<sup>11</sup>. Briefly, pediatric  
268 patients were classified as having COVID-19 via SARS-CoV-2 RT-PCR and as having MIS-C if  
269 they met the CDC case definition. Controls were healthy outpatients with no known history of  
270 COVID-19 who volunteered for specimen collection. Whole blood was collected in EDTA  
271 lavender top tubes and aliquoted for plasma extraction via centrifugation at 2500 rpm for  
272 15min. Samples were stored in a -80°C freezer and shipped on dry ice to either UCSF or  
273 Cornell for analysis.

274

275 **Sample Acquisition Children's National.** Samples were acquired from Children's National as  
276 previously described<sup>11</sup>. Briefly, pediatric patients were classified as having MIS-C if they met  
277 the CDC case definition. Whole blood samples were collected and centrifuged at 1300g for 5  
278 minutes at room temperature. Plasma was aliquoted into a cryovial and frozen at -80°C. A  
279 DMSO-based cryopreservative (Cryostor CS10) was added in a 1:1 ratio to the cell pellet and  
280 then frozen at -80°C in a controlled rate freezing container (i.e., Mr. Frosty) and then  
281 transferred to liquid nitrogen within 1 week.

282 **Clinical Data.** Patients were stratified as previously described<sup>11</sup>. For the purposes of this  
283 study, patients were classified as having MIS-C by multidisciplinary teams which adjudicated  
284 whether a patient met the CDC case definition of MIS-C. COVID-19 was defined as any patient  
285 with PCR-confirmed SARS-CoV-2 infection within the preceding 14 days who did not also  
286 meet the MIS-C case definition. Clinical data was abstracted from the medical record and  
287 inputted into a shared REDCap database housed at UCSF.



288

289 **Severity.** Patients were assigned a severity using the following criteria:

- 290
- 291 • Asymptomatic: This included patients with evidence of SARS-CoV-2 infection by  
292 nasopharyngeal RT- PCR but no symptoms of COVID-19, regardless of whether  
293 hospitalized for another cause or not hospitalized.
  - 294 • Mild: This included all outpatient cases (who did not require hospitalization for  
295 COVID-19) or if hospitalized, only upper respiratory symptoms, including fever, sore  
296 throat, cough, rhinorrhea, loss of sense of smell or taste from COVID-19 only.
  - 297 • Moderate: The patient must have been hospitalized due to COVID-19 respiratory  
298 disease and/or any systemic/non-respiratory symptoms attributed to COVID-19 (e.g.,  
299 neonatal fever, dehydration, new diagnosis diabetes, acute appendicitis, necrosis of  
300 extremities, diarrhea, encephalopathy, renal insufficiency, mild coagulation  
301 abnormalities, etc.) and/or MIS-C.
  - 302 • Severe: The patient must have been hospitalized for COVID-19 or MIS-C with either  
303 high-flow oxygen requirement (high-flow nasal cannula, bilevel positive airway  
304 pressure (BIPAP), intubation with mechanical ventilation, or extracorporeal  
305 membrane oxygenation (ECMO) and/or evidence of end-organ failure (acute renal  
306 failure requiring dialysis, coagulation abnormalities resulting in bleeding or stroke,  
307 diabetic ketoacidosis, hemodynamic instability requiring vasopressors) and/or dying  
308 from COVID-19 or MIS-C. These patients were almost always admitted to the ICU.

309 **Sample processing and sequencing.** Samples were processed as described previously<sup>11</sup>.

310 Briefly, samples were received on dry ice, RNA was extracted, libraries prepared, and

311 sequenced on a NextSeq or NovaSeq Illumina sequencer. Sequencing data was processed  
312 using a custom bioinformatics pipeline which included quality filtering and trimming, alignment  
313 to the human GRCh38 reference genome, and counting of gene features.

314

315 **Gene expression analyses.** Whole blood samples from three different categories (MIS-C,  
316 severe COVID-19, and healthy controls) were extracted as previously described and eluted in  
317 200 ul. RT-PCR was performed using 5 ul of TaqMan Fast Advanced Master Mix (Applied  
318 Biosystems 4369514), 1 ul of probe (predesigned TaqMan Probes, Thermo Fisher), 6 ul of  
319 nuclease-free water, and 8 ul of extracted material. All reactions were performed in a  
320 QuantStudio Real-Time PCR (Thermo Fisher) following this thermal-cycling conditions:  
321 incubation at 50°C for 2 minutes, enzyme activation 95°C for 20 seconds, and 40 cycles of  
322 denature step at 95°C for 3 seconds and anneal/extend 60°C for 30 seconds. Results were  
323 analyzed using the QuantStudio software.

324

325 **Machine learning.** Machine learning and model training was done using R (v4.1.1) with  
326 packages Caret (v6.0.90), tidyverse (v1.3.1), pROC (v1.18.0), PRROC (v1.3.1), DESeq2  
327 (v1.34.0), and data.table (v1.14.2). Sample metadata and count matrices were loaded as  
328 dataframes, and split 70/30 into a training set and a test set. Hospital of origin and severity of  
329 disease were considered while splitting the data to minimize differences in the training and test  
330 sets. Relevant features for model training were selected by filtering and differential  
331 expression/abundance analysis. First, genes with low counts (sum counts per million across  
332 samples < 15) and near zero variance (R caret package nearZeroVar function) were removed.  
333 Next, the top 300 genes were selected using differential expression/abundance analysis using

334 DESeq2<sup>14</sup> as ranked by absolute log<sub>2</sub> fold change (adjusted p.value < 0.05, basemean > 5).  
335 Machine learning algorithms were trained using the subset meta data using 5-fold cross  
336 validation and grid search hyperparameter tuning. Next, class predictions were predicted for  
337 the training set. Accuracy, sensitivity, specificity, and ROC AUC were used to measure test  
338 performance. The classification models used are generalized linear models with Ridge and  
339 LASSO feature selection (GLMNETRidge and GLMNETLasso), support vector machines with  
340 linear and radial basis function kernels (SVMLin and SVMRAD), random forest (RF), random  
341 forest ExtraTrees (EXTRATREES), neural networks (NNET), linear discriminant analysis  
342 (LDA), nearest shrunken centroids (PAM), C5.0 (C5), k-nearest neighbors (KNN), naive bayes  
343 (NB), CART (RPART), and logistic regression (GLM).

344  
345 **Acknowledgements.** We would like to acknowledge staff members at the UCSF Clinical  
346 Laboratories and the UCSF Clinical Microbiology Laboratories for their help in identifying and  
347 retrieving patient whole blood samples. We thank the Cornell Genomics Center and the UCSF  
348 Center for Advanced Technology for helping with sequencing libraries. At Emory, we thank  
349 Christopher Choi, Caroline Ciric, Khalel De Castro, Theda Gibson, Hui-Mien Hsiao, Wensheng  
350 Li, Austin Lu, Lisa Macoy, Kathy Stephens, Madeline Taylor, Ashley Tippet and the Children's  
351 Healthcare of Atlanta Research Laboratory for their contributions to specimen and data  
352 collection. We thank the patients and their families for contributing their blood to further our  
353 understanding of pediatric COVID-19 and MIS-C.

354  
355  
356 **Author Contributions**

357 A.S.-G., C.J.L., V.S., R.D., C.A.R., I.D.V., and C.Y.C. conceived and designed the study.  
358 C.J.L., A.S.-G., V.S., J.L., A.P.C., and A.B. performed sequencing experiments. A.S.-G., J.N.,  
359 J.L., M.E.W., P.S., N.B., J.S., W.S., C.H., N.W., A.F., A.G. K.B., M.A.P., L.H., E.J.A., A.C.,  
360 M.D., R.D., C.A.R., and C.Y.C. identified and collected patient samples and clinical metadata.  
361 C.J.L., V.S., B.B., M.D., R.D., C.A.R., I.D.V., and C.Y.C. analyzed sequencing data and built  
362 models. M.D., A.B., R.D., C.A.R., I.D.V., and C.Y.C. supervised the study. A.S.-G., C.J.L.,  
363 V.S., S.B., I.D.V., and C.Y.C. wrote the manuscript and prepared the figures. All authors read  
364 and edited the manuscript and agree to its contents.

365

#### 366 **Conflicts of Interest**

367 I.D.V. is a member of the Scientific Advisory Board of Karius Inc., Kanvas Biosciences and  
368 GenDX. C.Y.C. is a founder and a member of the Scientific Advisory Board of Delve Bio. I.D.V.  
369 and A.P.C. are listed as an inventor on submitted patents pertaining to cell-free DNA (US  
370 patent applications 63/237,367, 63/056,249, 63/015,095, 16/500,929) and receive consulting  
371 fees from Eurofins Viracor. C.A.R. received funding to conduct clinical research unrelated to  
372 this manuscript from BioFire Inc., GSK, MedImmune, Micron, Merck, Novavax, PaxVax,  
373 Regeneron, Pfizer, and Sanofi-Pasteur. She is co-inventor of patented RSV vaccine  
374 technology (International PCT Application No. PCT/US2016/058976, filed 12/28/2016 by  
375 Emory University), which has been licensed to Meissa Vaccines, Inc. with royalties received.  
376 Her institution has received funding from NIH to conduct clinical trials of Moderna and Janssen  
377 COVID-19 vaccines. E.J.A has consulted for Pfizer, Sanofi Pasteur, GSK, Janssen, and  
378 Medscape, and his institution receives funds to conduct clinical research unrelated to this  
379 manuscript from MedImmune, Regeneron, PaxVax, Pfizer, GSK, Merck, Sanofi-Pasteur,

380 Janssen, and Micron. He also serves on a safety monitoring board for Kentucky  
381 BioProcessing, Inc. and Sanofi Pasteur. He serves on a data adjudication board for WCG and  
382 ACI Clinical. His institution has also received funding from NIH to conduct clinical trials of  
383 Moderna and Janssen COVID-19 vaccines. A.B. is a co-founder and consultant to Personalis  
384 and NuMedii; consultant to Mango Tree Corporation, and in the recent past, Samsung, 10x  
385 Genomics, Helix, Pathway Genomics, and Verinata (Illumina); has served on paid advisory  
386 panels or boards for Geisinger Health, Regenstrief Institute, Gerson Lehman Group,  
387 AlphaSights, Covance, Novartis, Genentech, and Merck, and Roche; is a shareholder in  
388 Personalis and NuMedii; is a minor shareholder in Apple, Meta (Facebook), Alphabet (Google),  
389 Microsoft, Amazon, Snap, 10x Genomics, Illumina, Regeneron, Sanofi, Pfizer, Royalty  
390 Pharma, Moderna, Sutro, Doximity, BioNtech, Invitae, Pacific Biosciences, Editas Medicine,  
391 Nuna Health, Assay Depot, and Vet24seven, and several other non-health related companies  
392 and mutual funds; and has received honoraria and travel reimbursement for invited talks from  
393 Johnson and Johnson, Roche, Genentech, Pfizer, Merck, Lilly, Takeda, Varian, Mars,  
394 Siemens, Optum, Abbott, Celgene, AstraZeneca, AbbVie, Westat, and many academic  
395 institutions, medical or disease specific foundations and associations, and health systems.  
396 A.B. receives royalty payments through Stanford University, for several patents and other  
397 disclosures licensed to NuMedii and Personalis. Research from A.B. has been funded by NIH,  
398 Peraton (as the prime on an NIH contract), Genentech, Johnson and Johnson, FDA, Robert  
399 Wood Johnson Foundation, Leon Lowenstein Foundation, Intervallen Foundation, Priscilla  
400 Chan and Mark Zuckerberg, the Barbara and Gerson Bakar Foundation, and in the recent  
401 past, the March of Dimes, Juvenile Diabetes Research Foundation, California Governor Office  
402 of Planning and Research, California Institute for Regenerative Medicine, LOreal, and

403 Progenity. The authors have declared that none of these companies or competing interests  
404 had any role in this work or manuscript.

405

#### 406 **Data and Code Availability**

407 All code will be made available on Github. Processed sequencing data will be deposited in the  
408 National Institutes of Health (NIH) and National Center for Biotechnology Information (NCBI)  
409 Sequence Read Archive (SRA) and Gene Expression Omnibus (GEO) repositories under  
410 restricted access via Database for Genotypes and Phenotypes (dbGAP).

411

412

WITHDRAWN  
see manuscript DOI for details

## 413 REFERENCES

- 414 1 Abrams, J. Y. *et al.* Multisystem Inflammatory Syndrome in Children Associated with  
415 Severe Acute Respiratory Syndrome Coronavirus 2: A Systematic Review. *J Pediatr*  
416 **226**, 45-54 e41 (2020). <https://doi.org/10.1016/j.jpeds.2020.08.003>
- 417 2 Rey-Jurado, E. *et al.* Deep immunophenotyping reveals biomarkers of MIS-C in a Latin  
418 American cohort. *J Allergy Clin Immunol* (2022).  
419 <https://doi.org/10.1016/j.jaci.2022.09.006>
- 420 3 Godfred-Cato, S. *et al.* Distinguishing Multisystem Inflammatory Syndrome in Children  
421 From COVID-19, Kawasaki Disease and Toxic Shock Syndrome. *Pediatr Infect Dis J*  
422 **41**, 315-323 (2022). <https://doi.org/10.1097/INF.0000000000003449>
- 423 4 Kara, Y. *et al.* A Common Problem During the Pandemic Period; Multisystem  
424 Inflammatory Syndrome in Children or Gram-negative Sepsis? *Pediatr Infect Dis J* **41**,  
425 e29-e30 (2022). <https://doi.org/10.1097/INF.0000000000003345>
- 426 5 Zambrano, L. D. *et al.* Investigating Health Disparities Associated With Multisystem  
427 Inflammatory Syndrome in Children After SARS-CoV-2 Infection. *Pediatr Infect Dis J*  
428 (2022). <https://doi.org/10.1097/INF.0000000000003689>
- 429 6 CDC. *Health Department-Reported Cases of Multisystem Inflammatory Syndrome in*  
430 *Children (MIS-C) in the United States*, <[https://covid.cdc.gov/covid-data-tracker/#mis-](https://covid.cdc.gov/covid-data-tracker/#mis-national-surveillance)  
431 [national-surveillance](https://covid.cdc.gov/covid-data-tracker/#mis-national-surveillance)> (2022).
- 432 7 Montgomery, S. B., Bernstein, J. A. & Wheeler, M. T. Toward transcriptomics as a  
433 primary tool for rare disease investigation. *Cold Spring Harb Mol Case Stud* **8** (2022).  
434 <https://doi.org/10.1101/mcs.a006198>
- 435 8 Servellita, V. *et al.* A diagnostic classifier for gene expression-based identification of  
436 early Lyme disease. *Commun Med (Lond)* **2**, 92 (2022). [https://doi.org/10.1038/s43856-](https://doi.org/10.1038/s43856-022-00127-2)  
437 [022-00127-2](https://doi.org/10.1038/s43856-022-00127-2)
- 438 9 Zaas, A. K. *et al.* Gene expression signatures diagnose influenza and other  
439 symptomatic respiratory viral infections in humans. *Cell Host Microbe* **6**, 207-217  
440 (2009). <https://doi.org/10.1016/j.chom.2009.07.006>
- 441 10 Ng, D. L. *et al.* A diagnostic host response biosignature for COVID-19 from RNA  
442 profiling of nasal swabs and blood. *Sci Adv* **7** (2021).  
443 <https://doi.org/10.1126/sciadv.abe5984>
- 444 11 Loy, C. J. *et al.* Nucleic acid biomarkers of immune response and cell and tissue  
445 damage in children with COVID-19 and MIS-C. *medRxiv*, 2022.2006.2021.22276250  
446 (2022). <https://doi.org/10.1101/2022.06.21.22276250>
- 447 12 Beckmann, N. D. *et al.* Downregulation of exhausted cytotoxic T cells in gene  
448 expression networks of multisystem inflammatory syndrome in children. *Nat Commun*  
449 **12**, 4854 (2021). <https://doi.org/10.1038/s41467-021-24981-1>
- 450 13 Butler, D. *et al.* Shotgun transcriptome, spatial omics, and isothermal profiling of SARS-  
451 CoV-2 infection reveals unique host responses, viral diversification, and drug  
452 interactions. *Nat Commun* **12**, 1660 (2021). <https://doi.org/10.1038/s41467-021-21361-7>

- 453 14 Love, M. I., Huber, W. & Anders, S. Moderated estimation of fold change and dispersion  
454 for RNA-seq data with DESeq2. *Genome Biol* **15**, 550 (2014).  
455 <https://doi.org/10.1186/s13059-014-0550-8>
- 456 15 Feldstein, L. R. *et al.* Characteristics and Outcomes of US Children and Adolescents  
457 With Multisystem Inflammatory Syndrome in Children (MIS-C) Compared With Severe  
458 Acute COVID-19. *JAMA* **325**, 1074-1087 (2021).  
459 <https://doi.org/10.1001/jama.2021.2091>
- 460 16 Belhadjer, Z. *et al.* Acute Heart Failure in Multisystem Inflammatory Syndrome in  
461 Children in the Context of Global SARS-CoV-2 Pandemic. *Circulation* **142**, 429-436  
462 (2020). <https://doi.org/10.1161/CIRCULATIONAHA.120.048360>
- 463 17 Coleman, J. J., Manavi, K., Marson, E. J., Botkai, A. H. & Sapey, E. COVID-19: to be or  
464 not to be; that is the diagnostic question. *Postgrad Med J* **96**, 392-398 (2020).  
465 <https://doi.org/10.1136/postgradmedj-2020-137979>
- 466 18 Fistera, D. *et al.* What about the others: differential diagnosis of COVID-19 in a German  
467 emergency department. *BMC Infect Dis* **21**, 969 (2021). <https://doi.org/10.1186/s12879-021-06663-x>
- 469 19 Stoyanov, G., Dzhenkov, D. & Petkova, L. Non-COVID-19 viral respiratory tract infection  
470 as causes of death amid the pandemic: a report of two autopsy cases and tips for safe  
471 practice. *Folia Med (Plovdiv)* **63**, 608-612 (2021).  
472 <https://doi.org/10.3897/folmed.63.e56037>
- 473 20 Dailey, P. J., Elbeik, T. & Holodniy, M. Companion and complementary diagnostics for  
474 infectious diseases. *Expert Rev Mol Diagn* **20**, 619-636 (2020).  
475 <https://doi.org/10.1080/14737159.2020.1724784>
- 476 21 Mullen, J. L. *et al.* *outbreak.info*, <<https://outbreak.info/>> (2020).
- 477 22 Arbel, R. *et al.* Nirmatrelvir Use and Severe Covid-19 Outcomes during the Omicron  
478 Surge. *N Engl J Med* **387**, 790-798 (2022). <https://doi.org/10.1056/NEJMoa2204919>
- 479 23 Coenye, T. Do results obtained with RNA-sequencing require independent verification?  
480 *Biofilm* **3**, 100043 (2021). <https://doi.org/10.1016/j.bioflm.2021.100043>
- 481 24 Chang, L. J. *et al.* Accuracy and comparison of two rapid multiplex PCR tests for  
482 gastroenteritis pathogens: a systematic review and meta-analysis. *BMJ Open*  
483 *Gastroenterol* **8** (2021). <https://doi.org/10.1136/bmjgast-2020-000553>
- 484 25 Popowitch, E. B., Kaplan, S., Wu, Z., Tang, Y. W. & Miller, M. B. Comparative  
485 Performance of the Luminex NxTAG Respiratory Pathogen Panel, GenMark eSensor  
486 Respiratory Viral Panel, and BioFire FilmArray Respiratory Panel. *Microbiol Spectr* **10**,  
487 e0124822 (2022). <https://doi.org/10.1128/spectrum.01248-22>
- 488 26 Tansarli, G. S. & Chapin, K. C. Diagnostic test accuracy of the BioFire(R) FilmArray(R)  
489 meningitis/encephalitis panel: a systematic review and meta-analysis. *Clin Microbiol*  
490 *Infect* **26**, 281-290 (2020). <https://doi.org/10.1016/j.cmi.2019.11.016>

491
